# Supplementary material
Source: HighWire-hosted journal article supplement (https://tobaccocontrol.bmj.com/content/33/3/333)
Supplement: inline-supplementary-material-1 [file inline-supplementary-material-1.pdf]

**Figure S1: Multistage Sampling Design for Study Countries**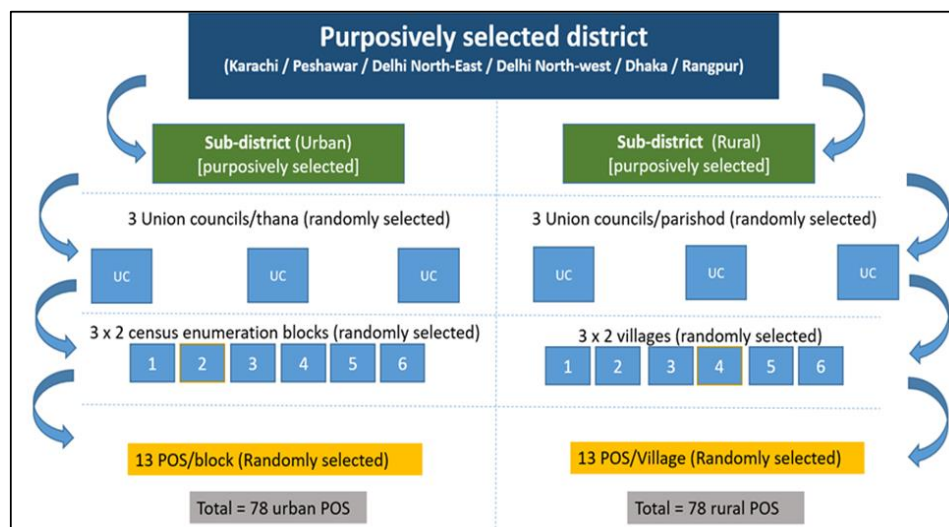

Source: Adapted from Zohaib et al. (2020)
